# Supplementary material for: Stress-induced NLRP3 inflammasome activation negatively regulates fear memory in mice
Source: PubMed Central journal article supplement (PMC7341659; doi:10.1186/s12974-020-01842-0), 2020-07-07

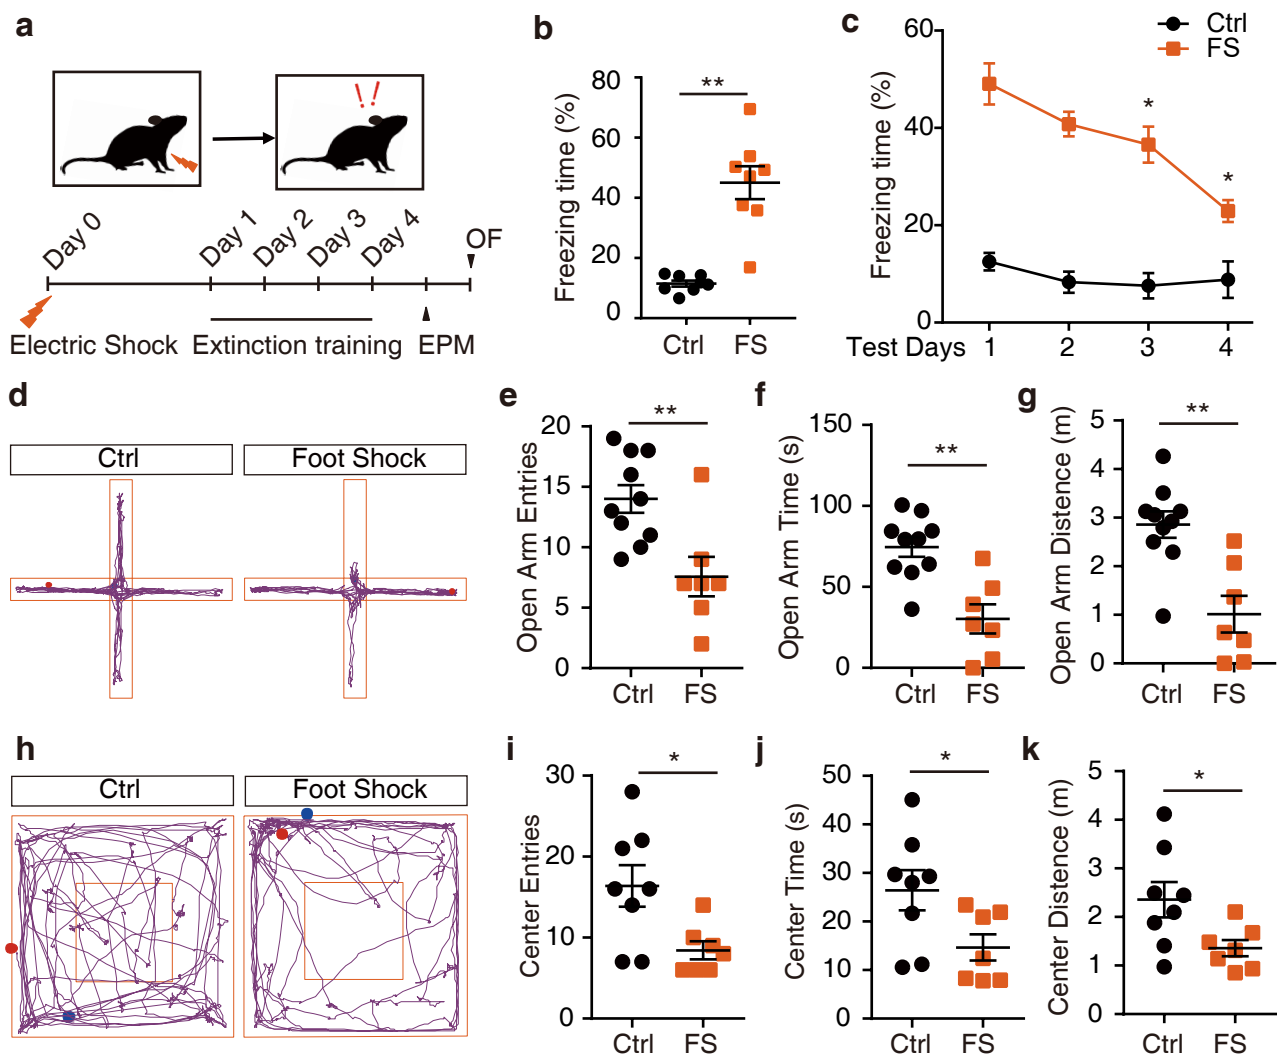

Figure S2

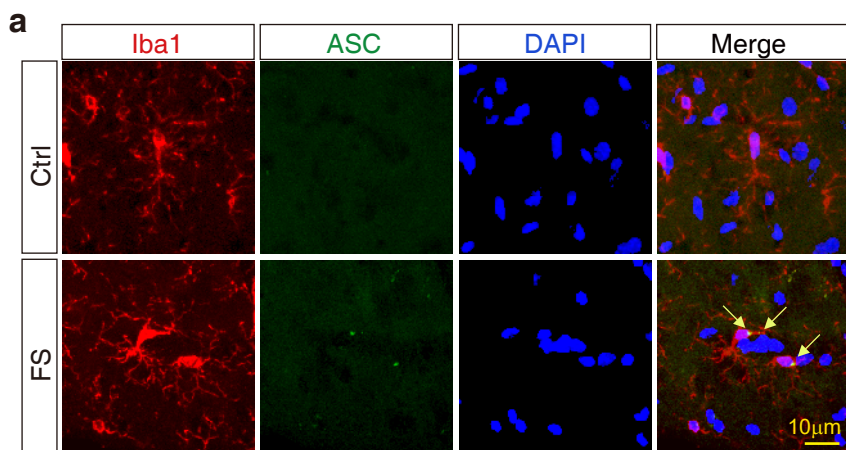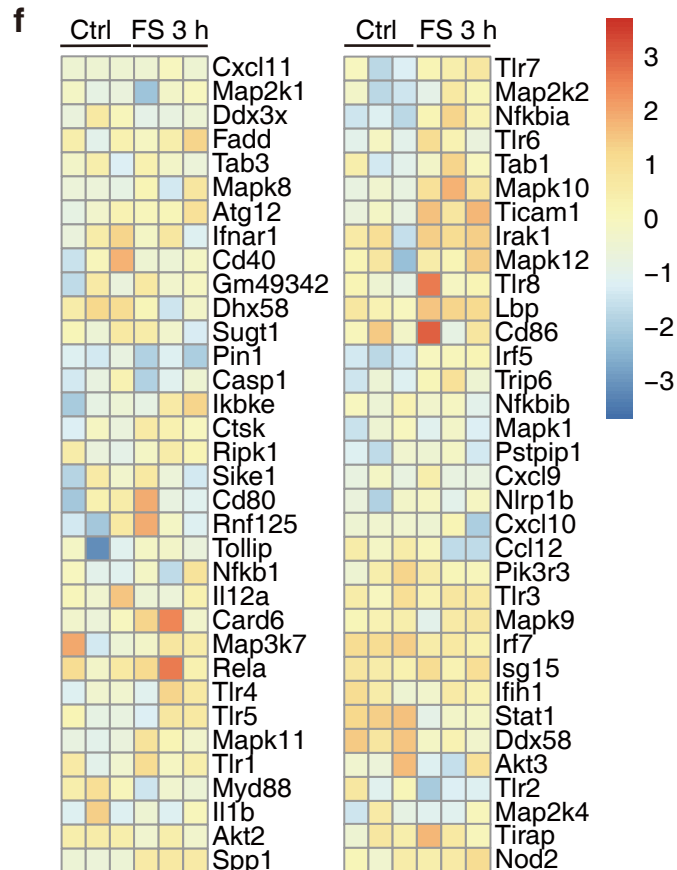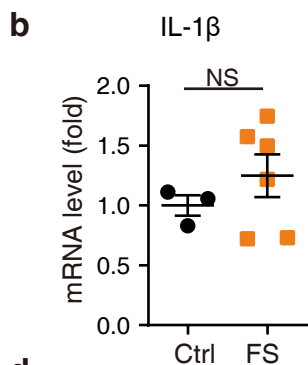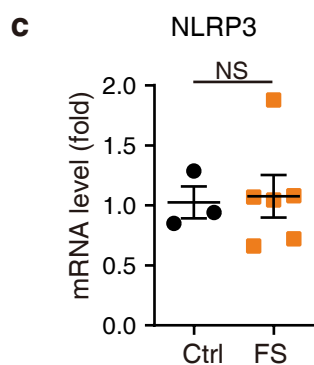

**d** FS 72 h vs Ctrl Up regulated

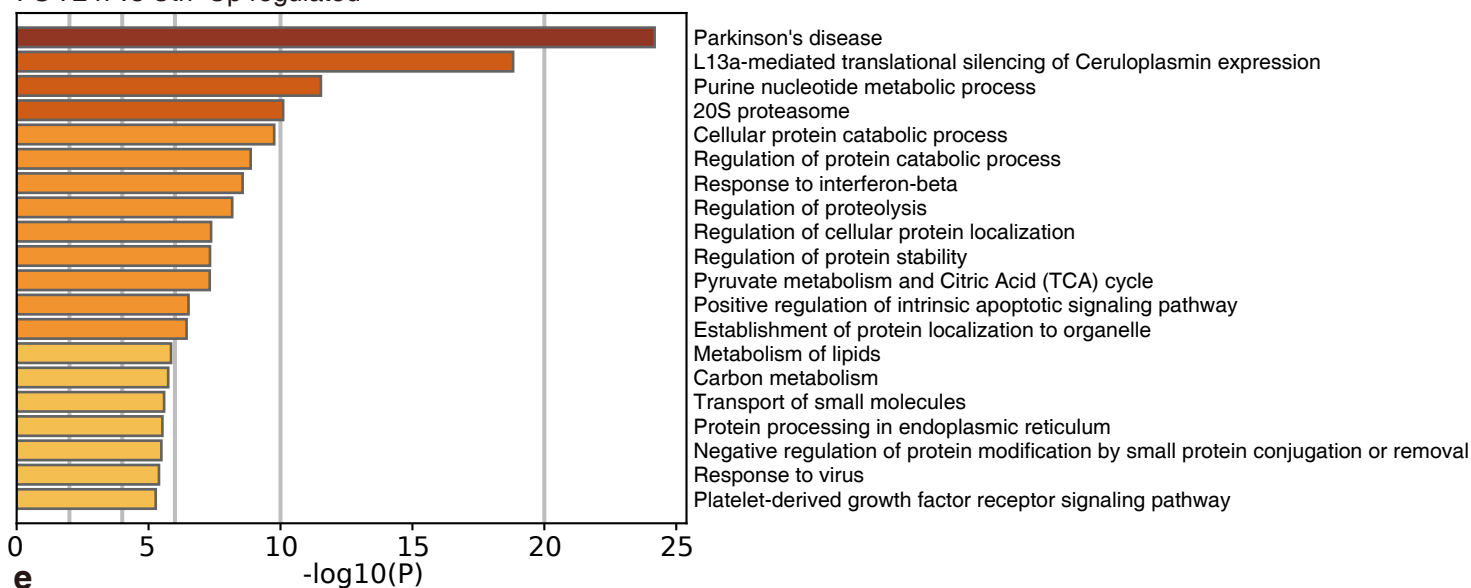

**e** FS 72 h vs Ctrl Down regulated

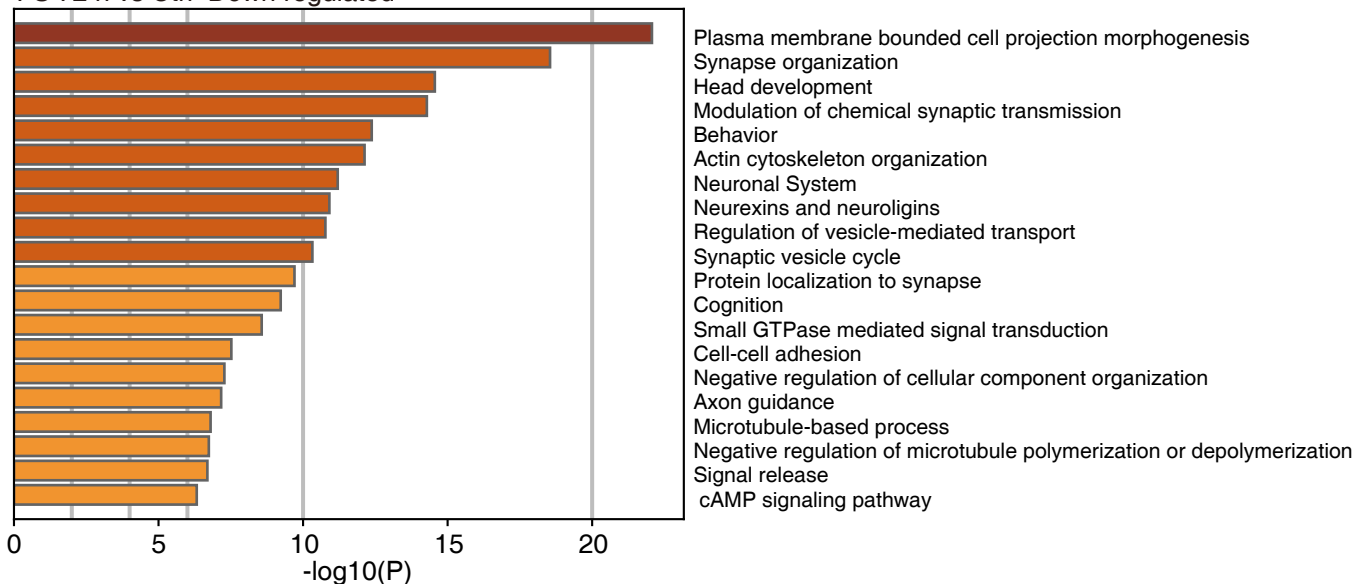

**a** *Nlrp3*<sup>-/-</sup> vs WT 72 h Up regulated

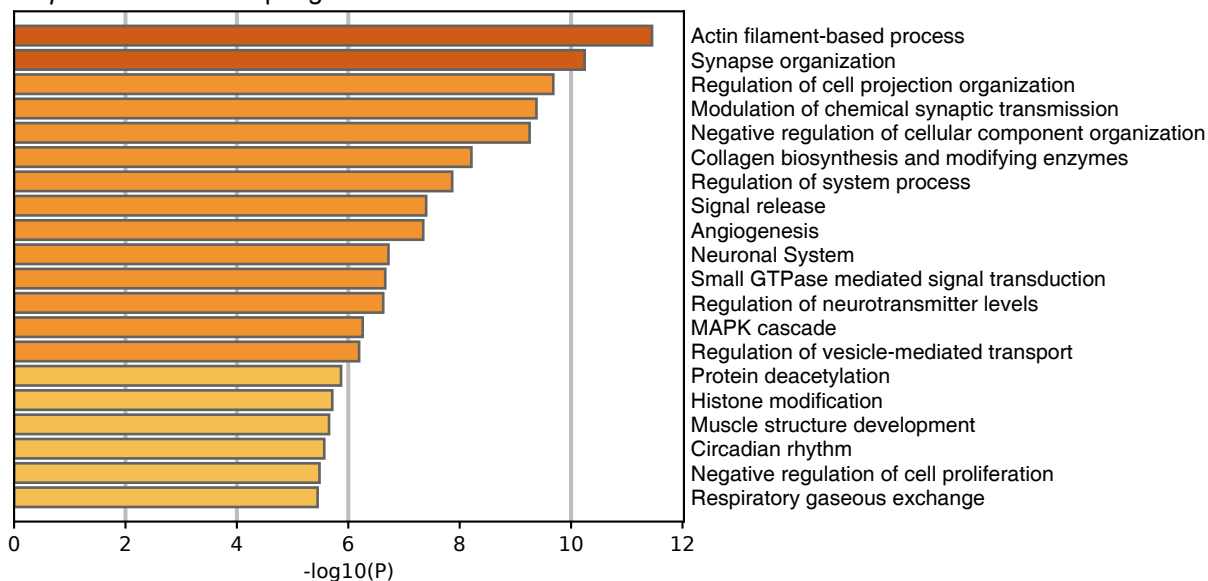

**b** *Nlrp3*<sup>-/-</sup> vs WT 72 h Down regulated

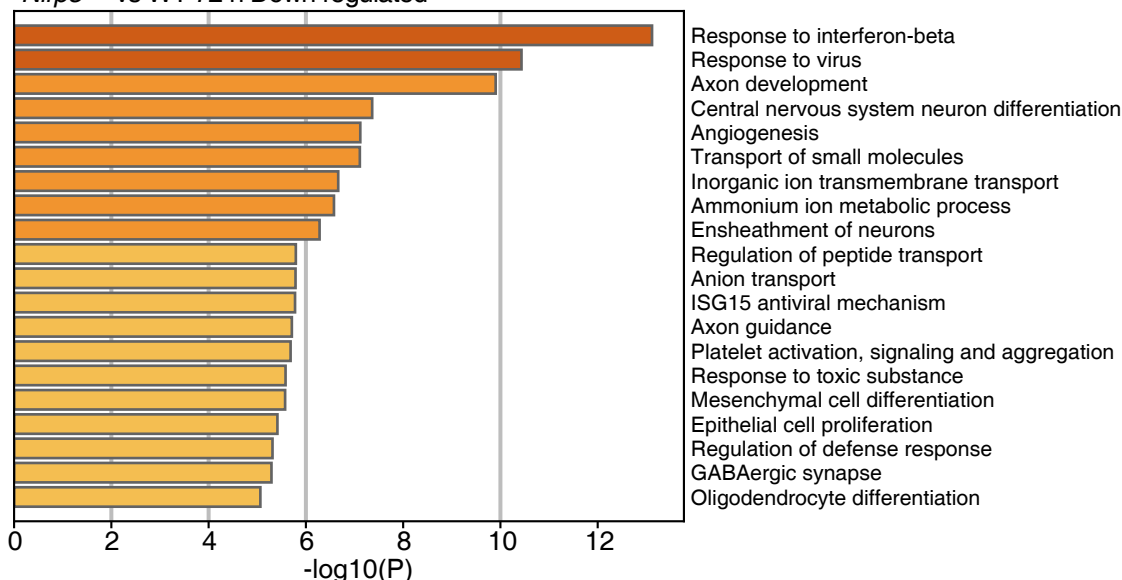

**c** FS 3 h  
 WT *Nlrp3*<sup>-/-</sup>

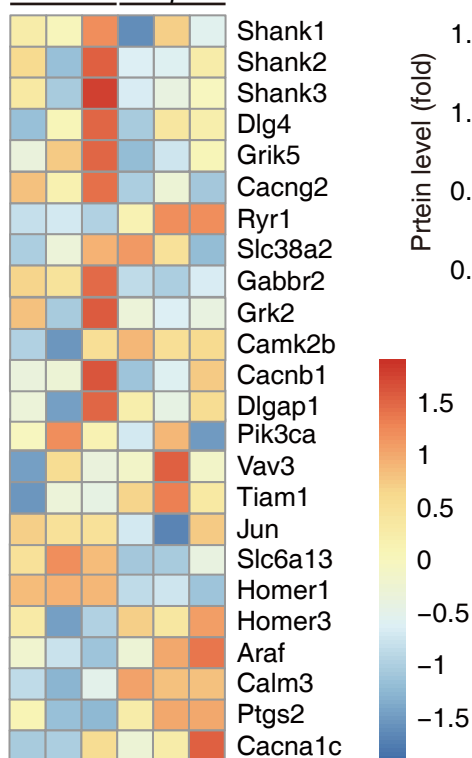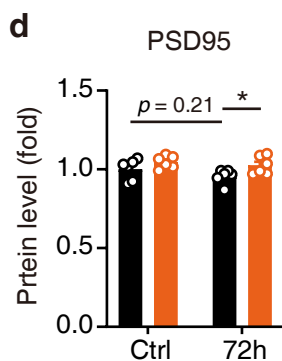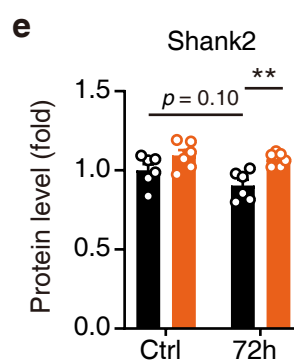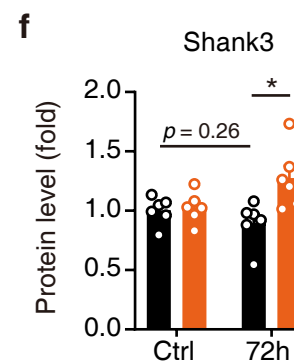

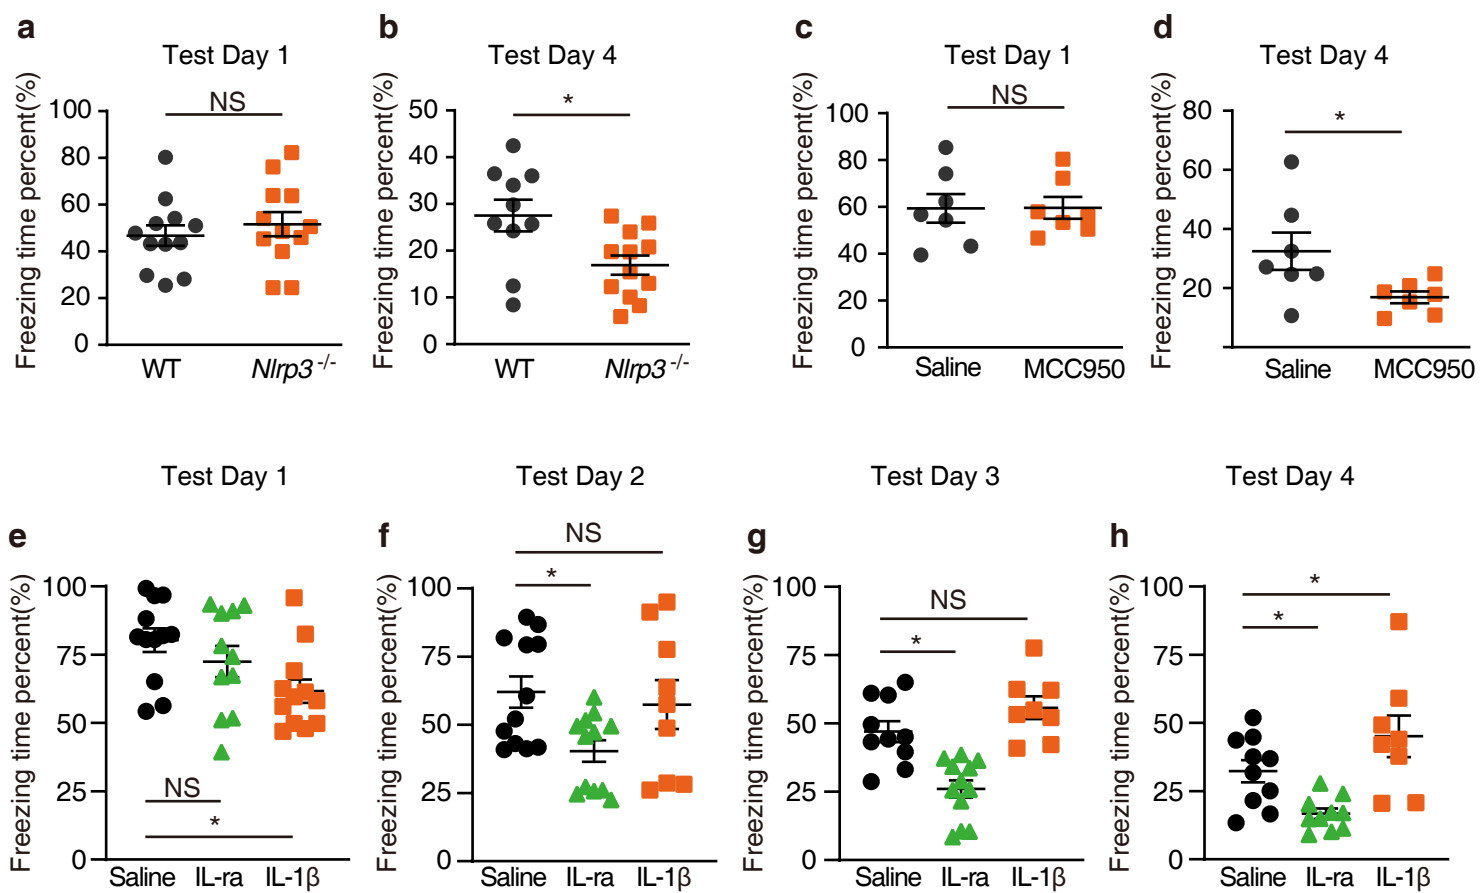

Supplement: 12974_2020_1842_MOESM2_ESM.pdf [file 12974_2020_1842_MOESM2_ESM.pdf]
